# Supplementary material
Source: PubMed Central journal article supplement (PMC6201834)
Supplement: NIHMS78006-supplement-Supplementary_Table_1.pdf [file NIHMS78006-supplement-Supplementary_Table_1.pdf]

**Supplementary Table 1 | Measurements of different MT lattice reconstructions**

|                                         | GMPCPP-DCX-MT | GDP.Pi-DCX-MT | GDP-DCX-MT    | GTPγS-DCX-MT   | GDP-DCX-Taxol®-MT |
|-----------------------------------------|---------------|---------------|---------------|----------------|-------------------|
| Number of asymmetric units <sup>a</sup> | 38,928        | 79,092        | 365,208       | 72,444         | 211,512           |
| Lattice spacing <sup>b</sup> (Å)        | 83.74 ± 0.20  | 81.74 ± 0.06  | 81.90 ± 0.06  | 82.10 ± 0.07   | 81.91 ± 0.09      |
| Intra-dimer distance <sup>c</sup> (Å)   | 40.52 ± 0.04  | 40.20 ± 0.15  | 40.37 ± 0.07  | 40.31 ± 0.04   | 40.37 ± 0.11      |
| Inter-dimer distance <sup>c</sup> (Å)   | 43.22 ± 0.07  | 41.93 ± 0.10  | 41.66 ± 0.08  | 41.78 ± 0.01   | 41.68 ± 0.08      |
| Lattice skew <sup>d</sup>               | 0.16 ± 0.08 ° | 0.00 ± 0.08 ° | 0.08 ± 0.07 ° | -0.02 ± 0.08 ° | 0.07 ± 0.06 °     |

<sup>a</sup>Number of particles multiplied by 12 due to symmetrisation of all PFs except that at the seam, which is not decorated by DCX. <sup>b</sup>Computed by Chuff (see Methods) from the reconstructions: datasets were divided in 3 approximately equal subsets; the calculations were done on them and then averaged to obtain standard deviation of the measurement. Differences between GDP.Pi-, GDP- and GTPγS-DCX-MTs are insignificant according to one-way analysis of statistical variance (ANOVA) computed with Prism 6 (graphpad.com). <sup>c</sup>Distance between centres of mass of the N domains calculated in 6-dimer models (see Methods) using CALCOM program (Costantini, S. *et al.*, *Bioinformatics* **2**, 271–272, 2008): 3 inter-dimer and 6 intra-dimer distances produced averages and standard deviations. <sup>d</sup>Differences in all pairwise comparisons are statistically significant, except: GDP-DCX-MT:GDP-DCX-Taxol®-MT and GDP.Pi-DCX-MT:GTPγS-DCX-MT pairs (Supplementary Fig. 6).
